# Supplementary material for: Co-Extraction of Flaxseed Protein and Polysaccharide with a High Emulsifying and Foaming Property: Enrichment through the Sequence Extraction Approach
Source: MDPI journal article supplement (doi:10.3390/foods12061256), 2023-03-16
Supplement: s1 [file s1]

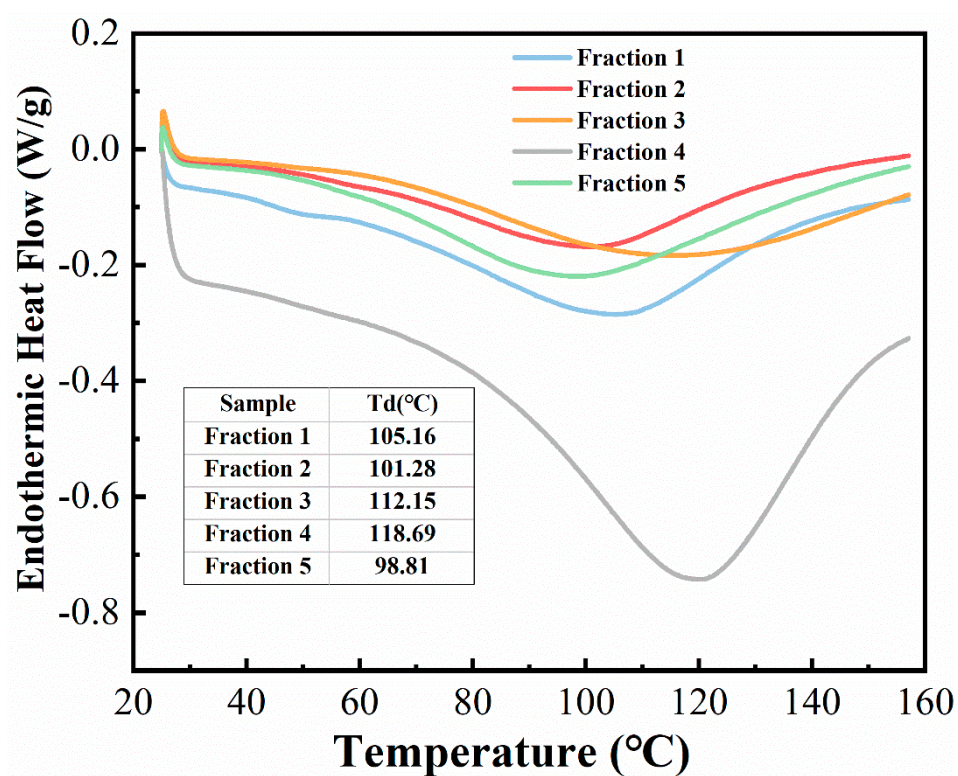

**Figure S1.** DSC curve and Td (Inserted table) of flaxseed fractions. Td represents denaturation temperature.
